# Supplementary material
Source: publisher figshare collection journal article supplement (https://karger.figshare.com/articles/dataset/_/28793906)

**Figure S3** Intercorrelations between BPD indicators, narcissism, and all clinical measures in the BPD sample (N=51)

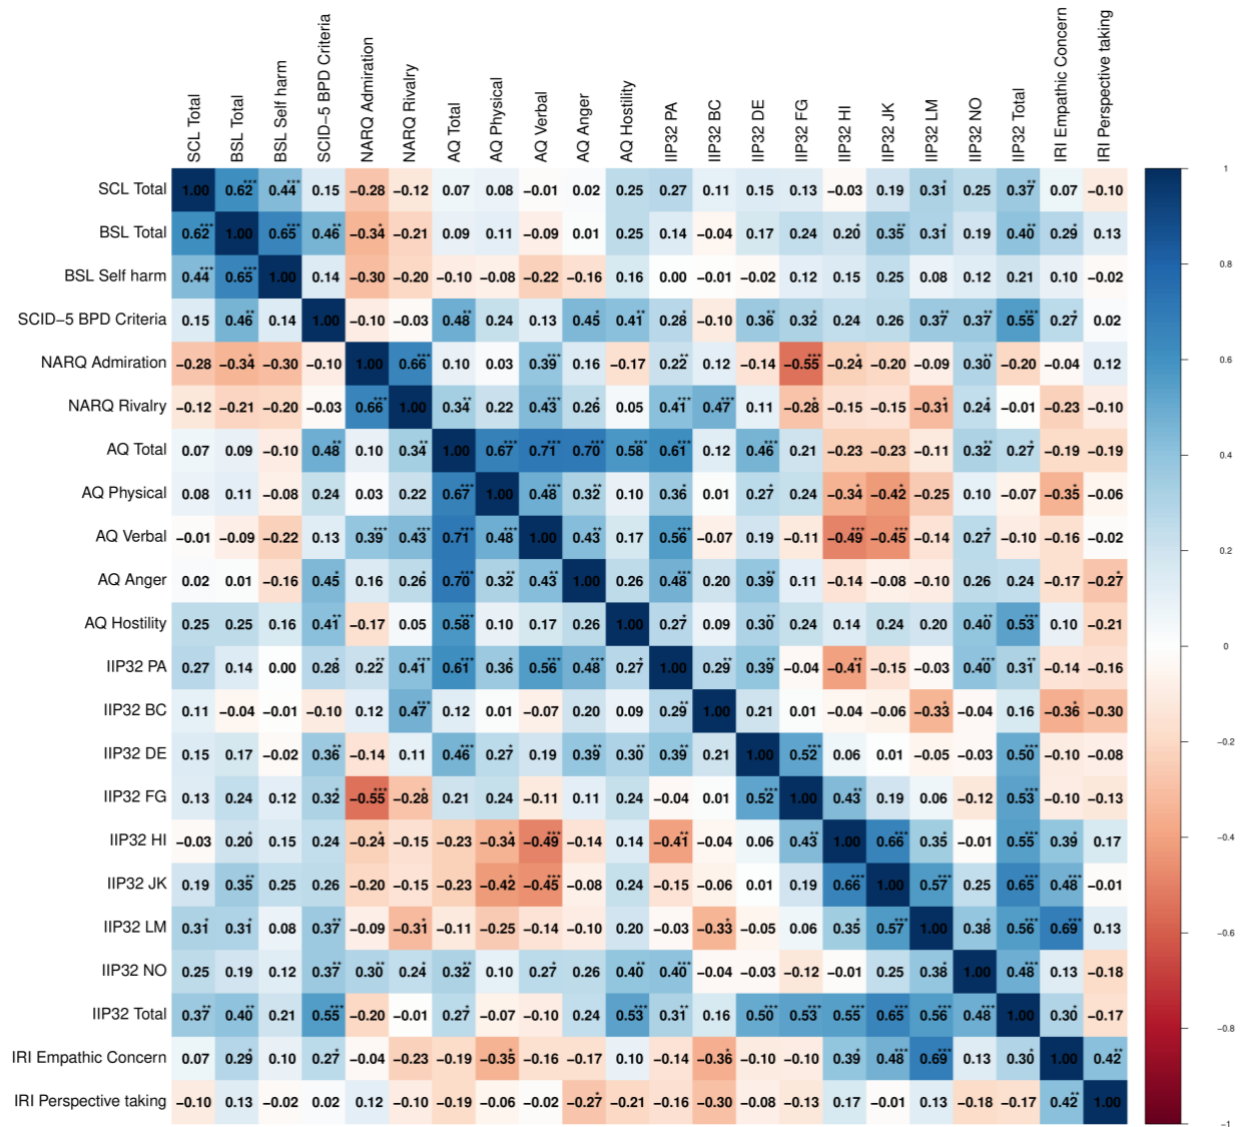

Supplement: Supplementary file 2 [file 1]
