# Supplementary material
Source: publisher figshare collection journal article supplement (https://karger.figshare.com/articles/dataset/_/28793906)

**Figure S1.** Flow of participants through each stage of the study

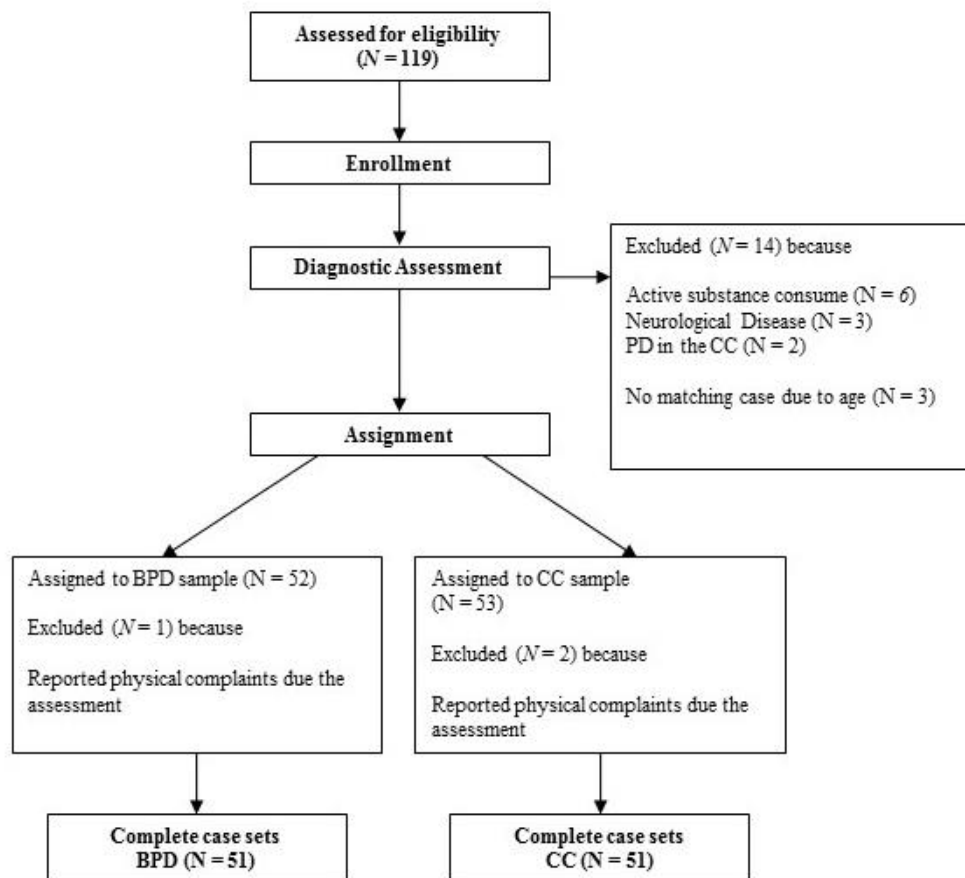

Supplement: Supplementary file 1 [file 1]
